# Supplementary material
Source: publisher figshare collection journal article supplement (https://acs.figshare.com/ndownloader/files/4464187)

## **Supporting information**

### **Excited state intramolecular proton transfer and subsequent charge transfer dynamics of 2-(2'-hydroxyphenyl)benzoxazole derivative in solution**

*Chul Hoon Kim, Jaehun Park, Jangwon Seo, Sehoon Kim, Soo Young Park, and Taiha Joo*

Department of Chemistry, Pohang University of Science and Technology

Pohang, 790-784, South Korea

**Figure S1.** Steady-state fluorescence spectrum of HBOCE in acetonitrile. An arrow indicates the position of the keto emission.

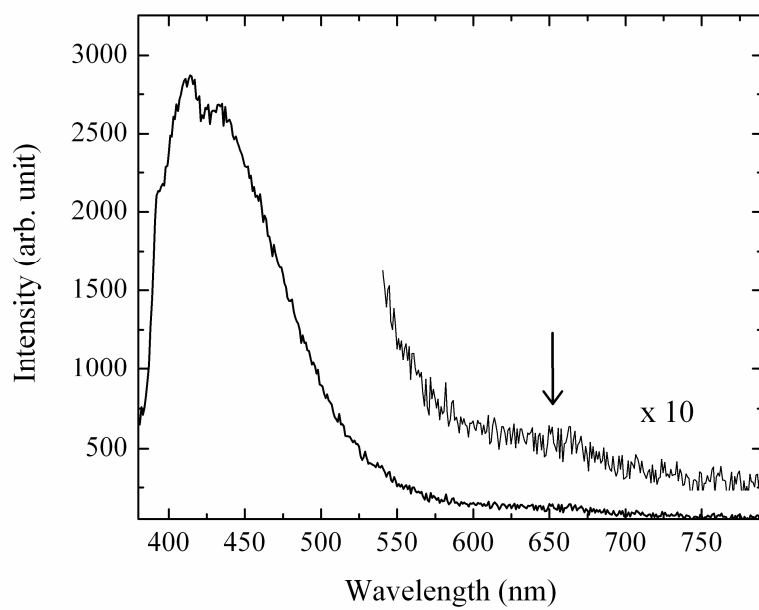

**Figure S2.** Global fit results of the time-resolved fluorescence spectra of HBOCE in the enol emission region. In chloroform and methanol, blue solid lines are included to subtract a background.

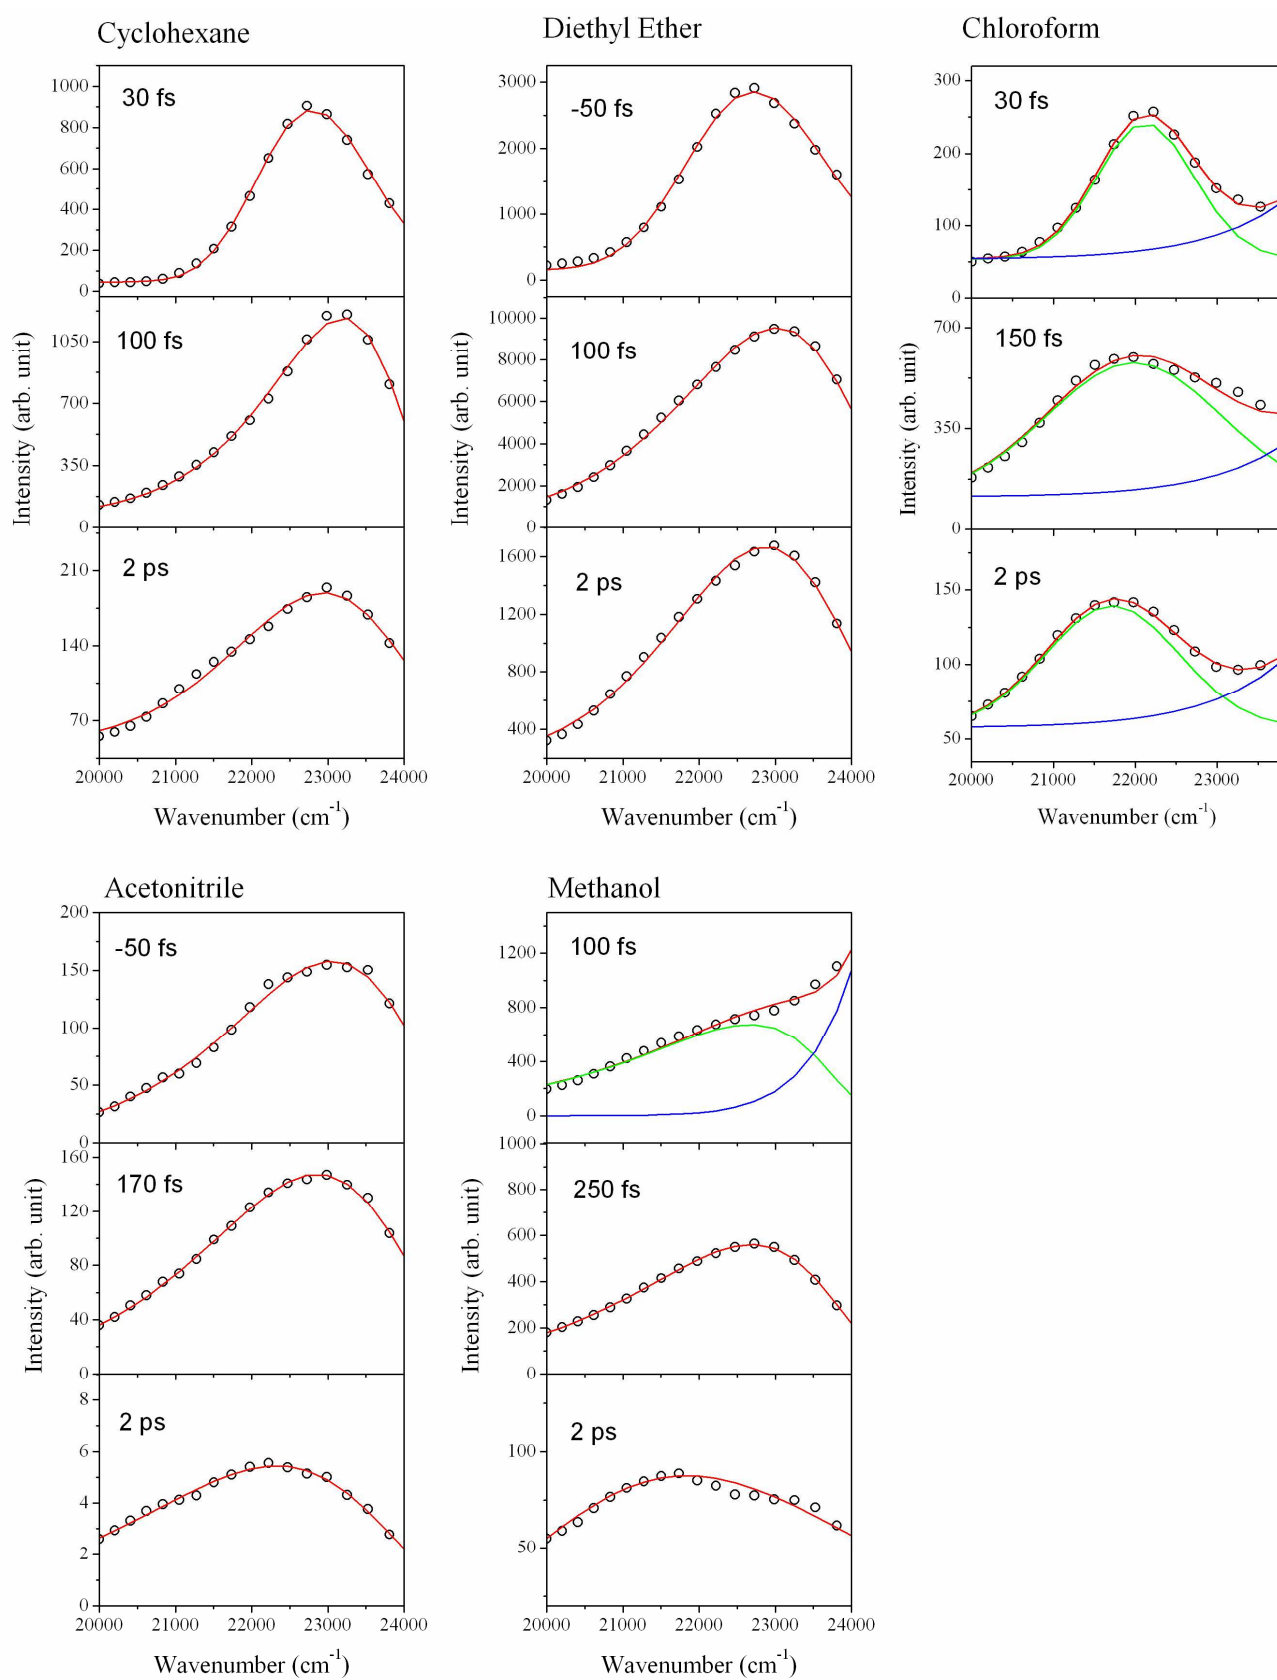

Supplement: Supplementary file 1 [file 4464187]
